# Supplementary material
Source: PubMed Central journal article supplement (PMC2813730)

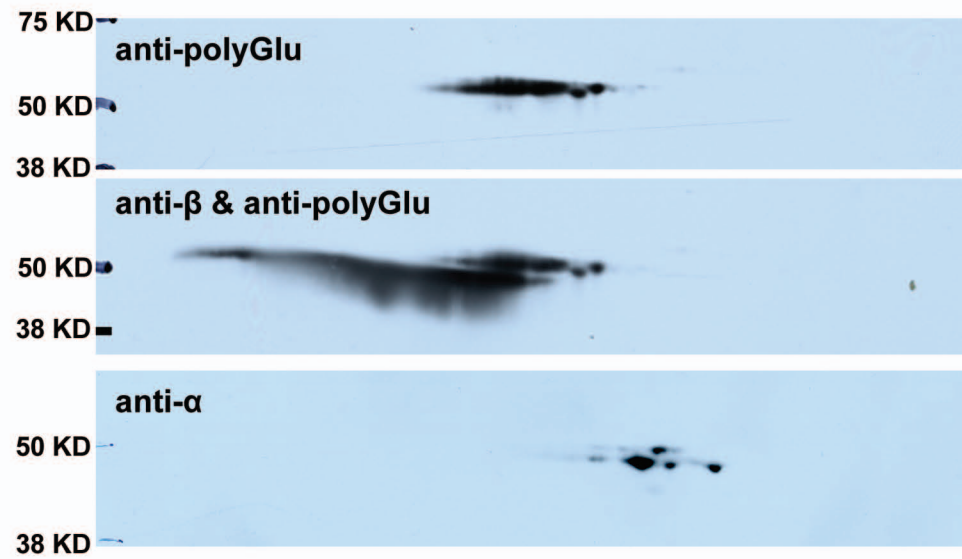

Supplement: NIHMS161067-supplement-2_si_002.pdf [file NIHMS161067-supplement-2_si_002.pdf]
